# Supplementary material for: Aromatic Characteristics of Passion Fruit Wines Measured by E-Nose, GC-Quadrupole MS, GC-Orbitrap-MS and Sensory Evaluation
Source: MDPI journal article supplement (doi:10.3390/foods11233789), 2022-11-24
Supplement: s1 [file s1]

**Table S1.** The standard curve, validation range, LOD, LOQ, HRF score and coefficient of determination (r<sup>2</sup>) for sulfur volatile compounds in passion fruit wine.

| Standard                                 | HRF score | Formula                                                      | M <sup>a</sup>  | Mass error (ppm) | Calibrated range (µg/L) | r <sup>2</sup> | Slope   | Intercept | LOD (µg/L) | LOQ   |
|------------------------------------------|-----------|--------------------------------------------------------------|-----------------|------------------|-------------------------|----------------|---------|-----------|------------|-------|
| Benzothiazole                            | 99.628    | C <sub>7</sub> H <sub>5</sub> NS <sup>+</sup>                | <b>135.0137</b> | 0.7021           | 0.01-43.75              | 0.9941         | 217.69  | -0.1519   | 0.001      | 0.005 |
|                                          |           |                                                              | *               |                  |                         |                |         |           | 6          | 3     |
|                                          |           | C <sub>6</sub> H <sub>4</sub> S <sup>+</sup>                 | 108.0029        | 0.7931           |                         |                |         |           |            |       |
|                                          |           | C <sub>4</sub> H <sub>2</sub> S <sup>+</sup>                 | 81.9872         | 0.9022           |                         |                |         |           |            |       |
| Diethyl disulfide                        | 97.0433   | C <sub>4</sub> H <sub>10</sub> S <sub>2</sub> <sup>+</sup>   | <b>122.0218</b> | 0.2315           | 0.08-41.00              | 0.9957         | 45.71   | 0.1037    | 0.006      | 0.020 |
|                                          |           |                                                              | *               |                  |                         |                |         |           | 8          | 4     |
|                                          |           | C <sub>2</sub> H <sub>6</sub> S <sub>2</sub> <sup>+</sup>    | 93.9906         | 0.6783           |                         |                |         |           |            |       |
|                                          |           | CH <sub>3</sub> S <sub>2</sub> <sup>+</sup>                  | 78.9672         | 0.7022           |                         |                |         |           |            |       |
| 3-(Methylthio)propanoic acid ethyl ester | 94.9905   | C <sub>6</sub> H <sub>12</sub> O <sub>2</sub> S <sup>+</sup> | <b>148.0553</b> | 0.1444           | 0.016-130.00            | 0.9964         | 396.81  | 0.0611    | 0.003      | 0.012 |
|                                          |           |                                                              | *               |                  |                         |                |         |           | 9          | 9     |
|                                          |           | C <sub>3</sub> H <sub>6</sub> S <sup>+</sup>                 | 74.0185*        | 0.2424           |                         |                |         |           |            |       |
|                                          |           | C <sub>3</sub> H <sub>7</sub> S <sup>+</sup>                 | 75.0263         | 0.2631           |                         |                |         |           |            |       |
| 3-(Methylthio)propyl acetate             | 95.1033   | C <sub>6</sub> H <sub>12</sub> O <sub>2</sub> S <sup>+</sup> | <b>148.0553</b> | 0.6668           | 0.88-113.20             | 0.9955         | 3069.50 | -6.7311   | 0.006      | 0.020 |
|                                          |           |                                                              | *               |                  |                         |                |         |           | 8          | 4     |
|                                          |           | C <sub>4</sub> H <sub>8</sub> S <sup>+</sup>                 | 88.0341*        | 0.3762           |                         |                |         |           |            |       |
|                                          |           | C <sub>3</sub> H <sub>5</sub> O <sub>2</sub> <sup>+</sup>    | 73.0285         | 0.8079           |                         |                |         |           |            |       |
| Methionol                                | 97.0737   | C <sub>4</sub> H <sub>10</sub> OS <sup>+</sup>               | <b>106.0447</b> | 0.5426           | 5.16-1320.00            | 0.9977         | 17319.0 | -32.435   | 0.012      | 0.042 |
|                                          |           |                                                              | *               |                  |                         |                |         |           | 8          | 8     |
|                                          |           | C <sub>4</sub> H <sub>8</sub> S <sup>+</sup>                 | 88.0342         | 0.8896           |                         |                |         |           |            |       |
|                                          |           | C <sub>3</sub> H <sub>5</sub> S <sup>+</sup>                 | 73.0107         | 0.8977           |                         |                |         |           |            |       |
| 3-Mercaptohexyl acetate                  | 99.7294   | C <sub>4</sub> H <sub>7</sub> S <sup>+</sup>                 | 87.0263*        | 0.2711           | 0.36-179.04             | 0.9993         | 910.40  | -1.6925   | 0.002      | 0.007 |
|                                          |           |                                                              |                 |                  |                         |                |         |           | 4          | 2     |
|                                          |           | C <sub>5</sub> H <sub>9</sub> S <sup>+</sup>                 | 101.0419        | 0.3188           |                         |                |         |           |            |       |
|                                          |           | C <sub>6</sub> H <sub>12</sub> S <sup>+</sup>                | 116.0655        | 0.4352           |                         |                |         |           |            |       |
| 2-Methyltetrahydrothiophen-3-one         | 100       | C <sub>5</sub> H <sub>8</sub> OS <sup>+</sup>                | <b>116.0291</b> | 0.4785           | 0.72-46.38              | 0.9993         | 1043.00 | -1.2723   | 0.002      | 0.008 |
|                                          |           |                                                              | *               |                  |                         |                |         |           | 6          | 6     |
|                                          |           | C <sub>4</sub> H <sub>8</sub> S <sup>+</sup>                 | 88.0342         | 0.5219           |                         |                |         |           |            |       |
|                                          |           | C <sub>2</sub> H <sub>4</sub> S <sup>+</sup>                 | 60.0029         | 0.7119           |                         |                |         |           |            |       |
| 3-Mercaptohexanol                        | 93.3314   | C <sub>6</sub> H <sub>14</sub> OS <sup>+</sup>               | <b>134.0761</b> | 0.6841           | 0.24-30.88              | 0.9995         | 1761.80 | -0.0445   | 0.046      | 0.155 |
|                                          |           |                                                              |                 |                  |                         |                |         |           | 7          | 6     |
|                                          |           | C <sub>6</sub> H <sub>10</sub> <sup>+</sup>                  | 82.0777*        | 0.9026           |                         |                |         |           |            |       |
|                                          |           | C <sub>5</sub> H <sub>7</sub> <sup>+</sup>                   | 67.0543         | 0.9502           |                         |                |         |           |            |       |
| S-Ethyl ethanethioate                    | 96.0453   | C <sub>4</sub> H <sub>8</sub> OS <sup>+</sup>                | <b>104.0291</b> | 0.5094           | 1.60-226.00             | 0.9984         | 489.79  | 0.792     | 0.012      | 0.038 |
|                                          |           |                                                              |                 |                  |                         |                |         |           | 8          | 4     |
|                                          |           | C <sub>2</sub> H <sub>3</sub> O <sup>+</sup>                 | 43.0178*        | 0.4076           |                         |                |         |           |            |       |
|                                          |           | C <sub>2</sub> H <sub>4</sub> S <sup>+</sup>                 | 60.0028         | 0.8044           |                         |                |         |           |            |       |

a HRF (High-Resolution Filtering score); percentage of the spectrum obtained by MS Orbitrap that can be explained by combination of accurate mass, library matching and percentage of explained ions observed.

b Exact mass spectra

c Limit of detection

d Limit of quantification

\* Quantitative ion

bold: Molecular ion peak

**Table S2.** Significant differences of OAV among yeast strain ES488 (ES), BV818 (BV), VIC (VI), and CY3079 (CY).

| Odor series             | ES            | BV            | VI            | CY             |
|-------------------------|---------------|---------------|---------------|----------------|
| Fruity                  | 1591.78±7.07a | 288.68±4.24d  | 330.57±3.19c  | 372.9±1.98b    |
| Floral                  | 9017.49±7.78b | 7342.91±5.23d | 8533.87±6.16c | 10333.03±7.44a |
| Herbaceous (or vegetal) | 781.72±21.21a | 476.5±3.94b   | 305.76±3.22c  | 21.8±1.21d     |
| Caramel                 | 228.24±5.66b  | 180.04±3.46c  | 252.07±2.83a  | 253.25±2.23a   |
| Earthy                  | 2.15±0.09a    | 1.83±0.08a    | 2.19±0.13a    | 2.2±0.14a      |
| Chemical                | 112.05±1.38c  | 176.81±2.12a  | 151.64±1.09b  | 69.6±1.71d     |
| Fatty                   | 280.57±4.93c  | 321.65±2.79b  | 355.7±2.55a   | 366.22±3.62a   |

Data are the mean ± standard deviation of duplicate tests. Different letters in each row indicate significant difference at a significant level of 0.05.

**Table S3. Mean, standard deviation value and Tukey's test of sensory evaluation.**

| Attribute     | ES          | BV          | VI          | CY          |
|---------------|-------------|-------------|-------------|-------------|
| Passion fruit | 89.44±0.39a | 87.93±0.47a | 74.1±0.71b  | 75±0.71b    |
| Mango         | 47.38±0.44b | 49.92±0.37b | 58.62±0.48a | 60.13±0.61a |
| Green apple   | 45.28±0.51b | 32.57±0.3d  | 39.77±0.87c | 50.45±0.39a |
| Lemon         | 46.54±0.54b | 53.56±0.52a | 37.94±0.25c | 48.07±0.3b  |
| Floral        | 1.95±0.04d  | 6.32±0.06c  | 12.88±0.08b | 37.45±0.46a |

Data are the mean ± standard deviation of duplicate tests. Different letters in each row indicate significant difference at a significant level of 0.05.

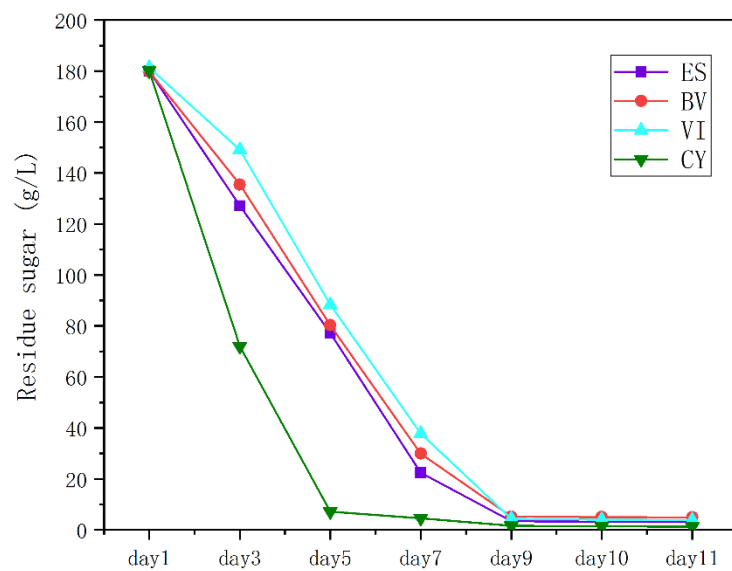

**Figure S1.** Residual sugar of passion fruit wine fermented by commercial yeast strain ES488 (ES), BV818 (BV), VIC (VI), and CY3079 (CY).
